# Supplementary material for: Development of a novel semi-automated analytical system of microplastics using reflectance-FTIR spectrometry: designed for the analysis of large microplastics
Source: Royal Society of Chemistry journal article supplement (doi:10.1039/d4va00400k), 2025-01-01
Supplement: d4va00400k1.pdf [file d4va00400k1.pdf]

## Electronic Supporting Information

### Development of a novel semi-automated analytical system of microplastics using reflectance-FTIR spectrometry: Designed for the analysis of large microplastics

Ryota Nakajima<sup>1\*</sup>, Hiromi Sawada<sup>2</sup>, Shinichiro Hayashi<sup>2</sup>, Akishi Nara<sup>2</sup>, Mitsunari Hattori<sup>2</sup>

<sup>1</sup> Japan Agency for Marine-Earth Science and Technology (JAMSTEC), 2-15 Natsushima, Yokosuka, Kanagawa 237-0061, Japan

<sup>2</sup> Thermo Fisher Scientific K.K., 3-9 Moriya, Yokohama, Kanagawa 221-0022, Japan

\*Corresponding author: Ryota Nakajima, [nakajimar@jamstec.go.jp](mailto:nakajimar@jamstec.go.jp), +81-46-867-9686

Measurement flow with MARS

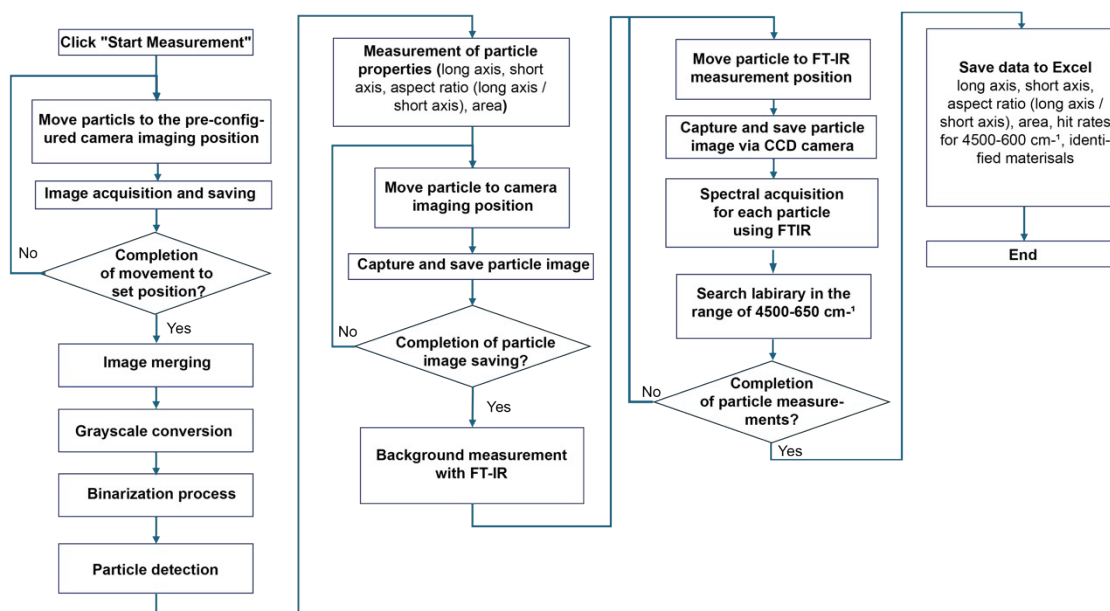

**Fig.S1**

Workflow of the analysis using MARS (Microplastic Analyzer using Reflectance-FTIR Semi-automatically).

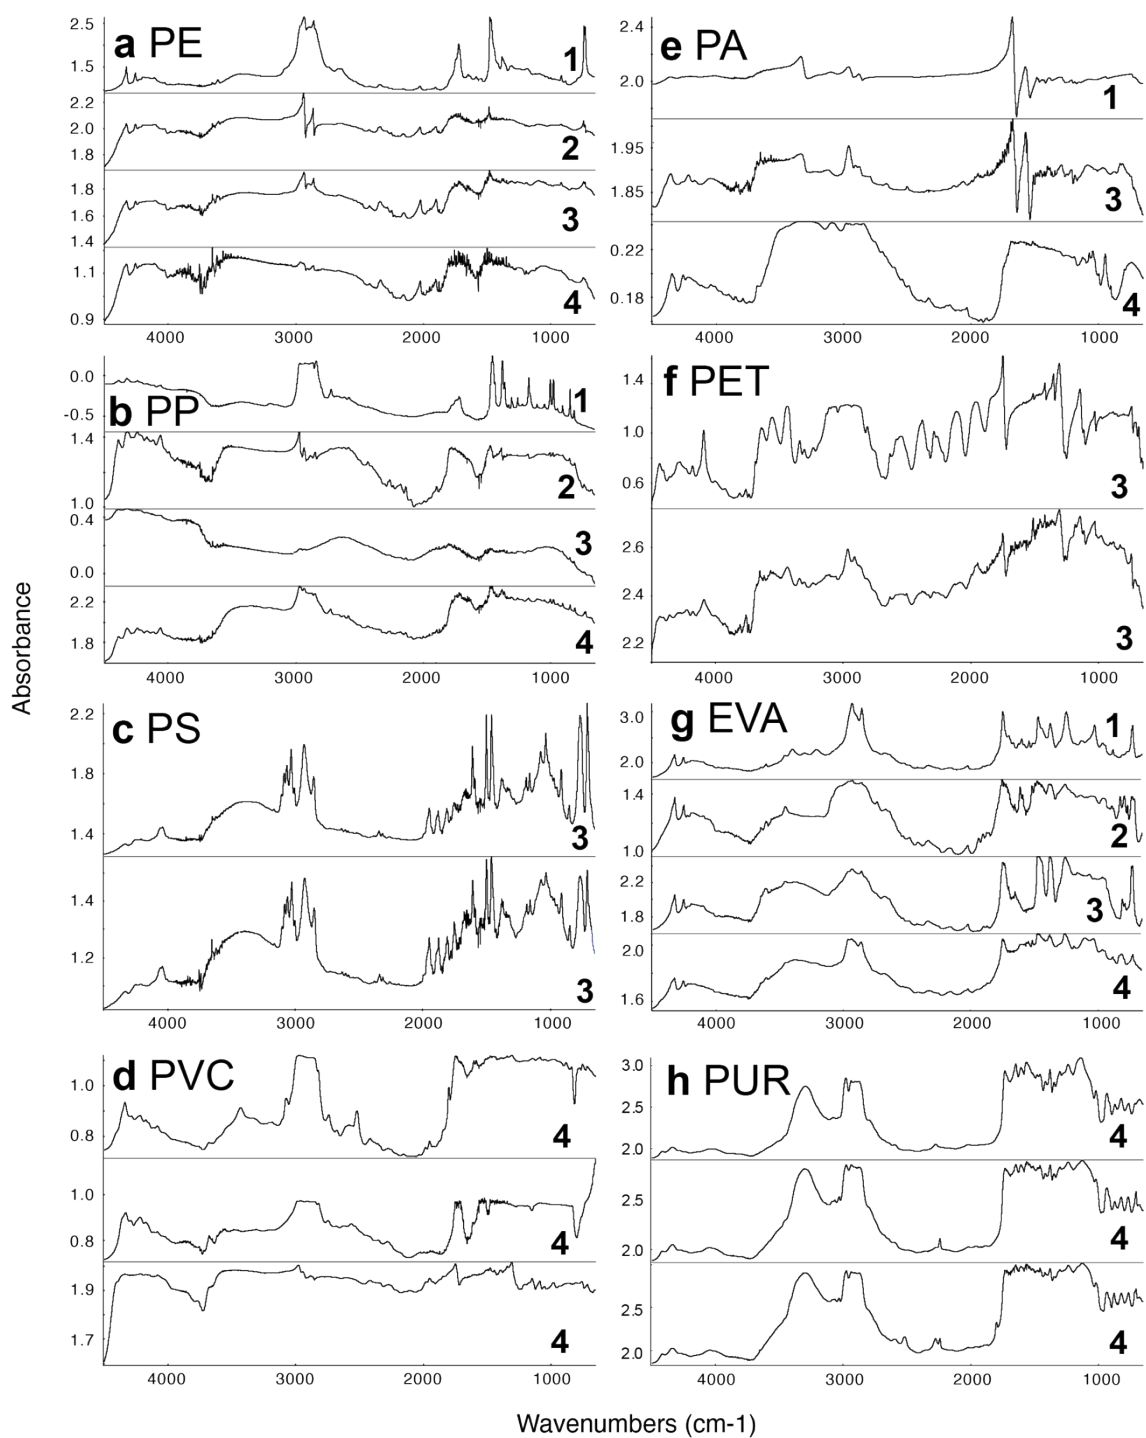

**Fig. S2**

Reflectance spectral features of plastic particles from each polymer type with two to four identified characteristics: (1) spectra with strong specular reflection (differentiated peak shape), (2) diffuse reflection spectra (low peak distortion, i.e., absence of specular reflection), (3) spectra with a mix of specular and diffuse reflection, and (4) highly saturated spectra (where peak shapes are nearly unobservable). (a) polyethylene (PE), (b) polypropylene (PP), (c) polystyrene (PS), (d)

polyvinyl chloride (PVC), (e) polyamide (PA), (f) polyethylene terephthalate (PET), (g) ethylene-vinyl acetate (EVA), and (h) polyurethane (PUR).
