# Supplementary figures and images for: Development of a novel semi-automated analytical system of microplastics using reflectance-FTIR spectrometry: designed for the analysis of large microplastics
Source: Royal Society of Chemistry journal article supplement (doi:10.1039/d4va00400k), 2025-01-01

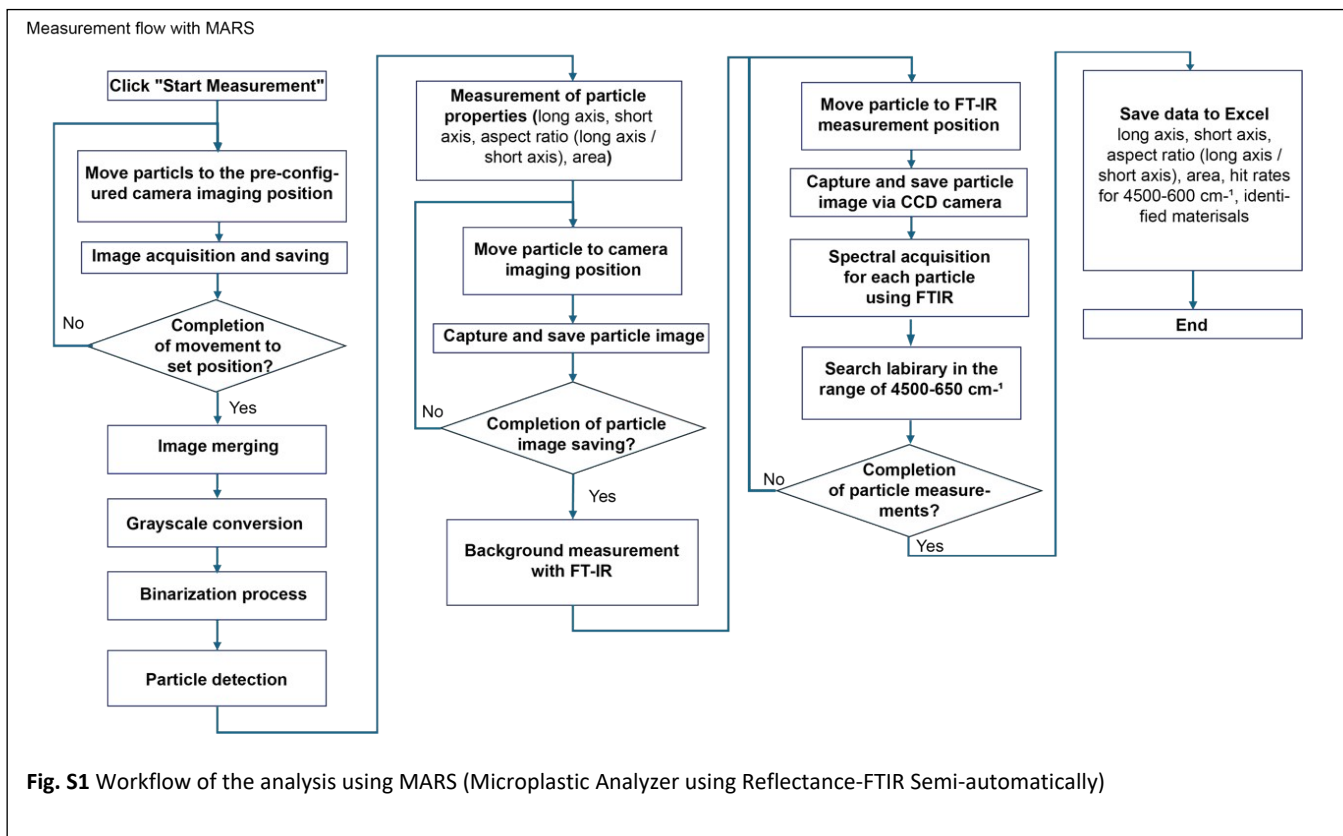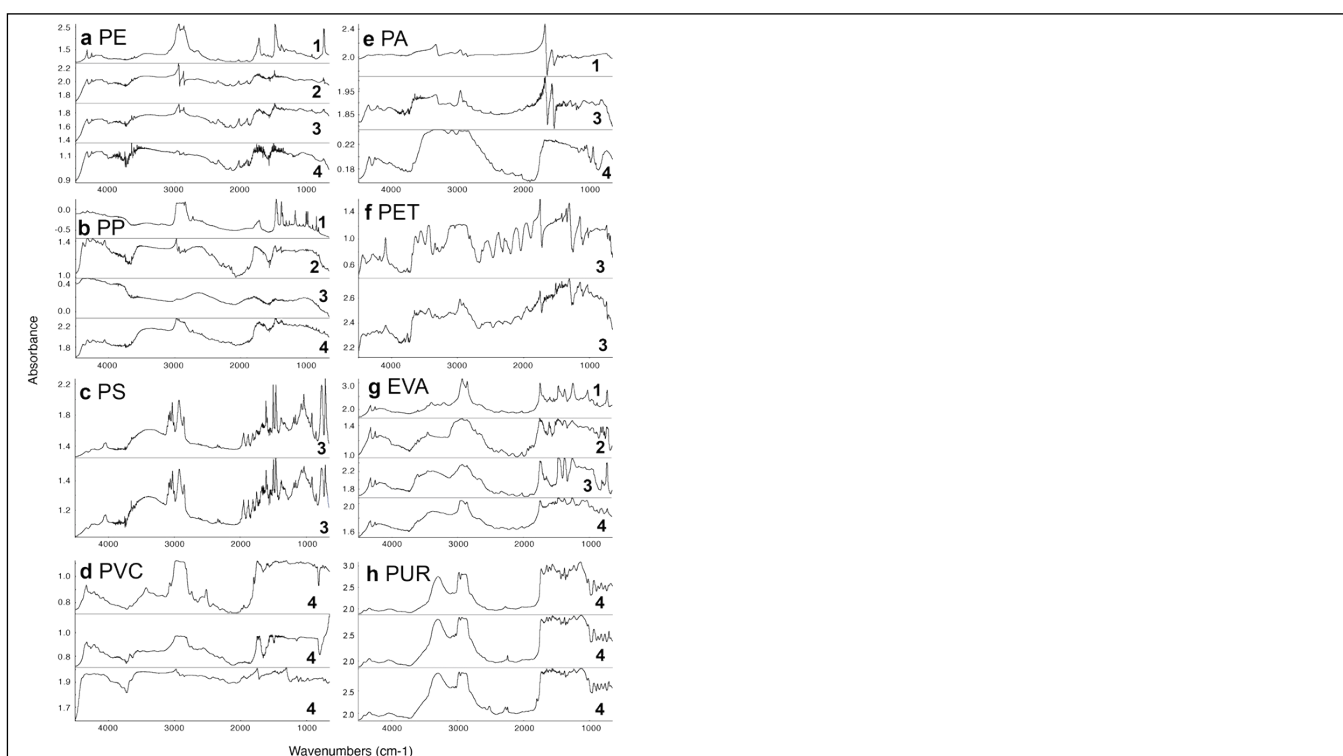

Supplement: d4va00400k2.pdf [file d4va00400k2.pdf]
